# Supplementary material
Source: PubMed Central journal article supplement (PMC5832935)
Supplement: 10.1194_M081091_jlr.M081091-1.pdf [file 10.1194_M081091_jlr.M081091-1.pdf]

Supplemental Figures and Tables

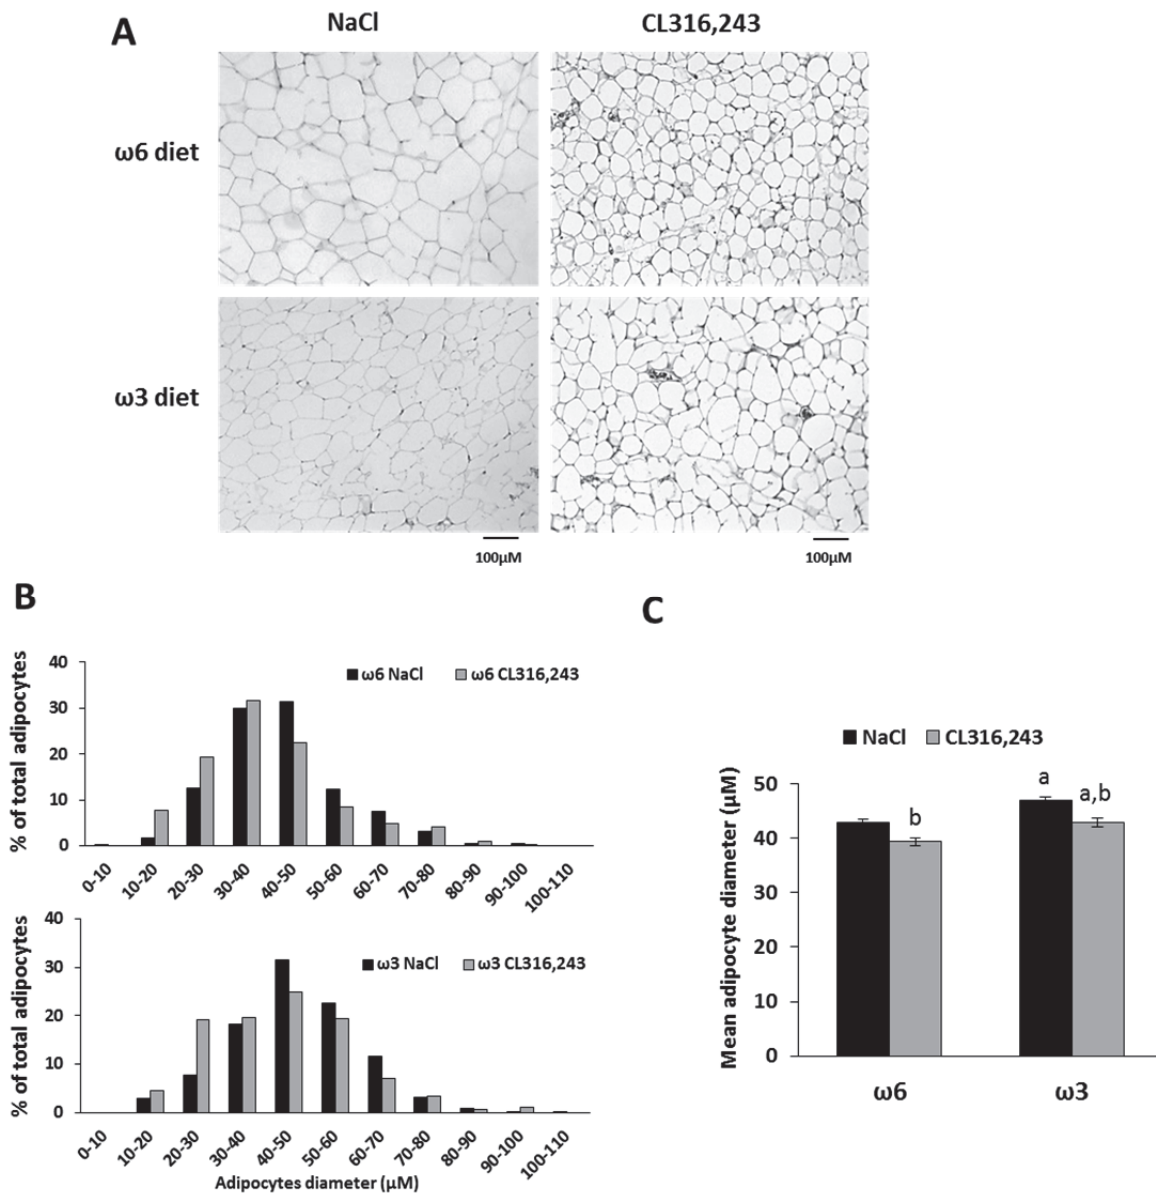

**Supplemental Figure S1. Morphological analysis of epididymal white adipose tissue.** A)

Histological analysis of epididymal WAT (eWAT) sections from mice fed  $\omega 6$  or  $\omega 3$ -diet stained with hematoxylin and eosin. B) Distribution and (C) mean diameter of adipocytes. Data are presented as % of total adipocytes or mean  $\pm$  SEM, n = 500 adipocytes from 4 mice per group. a =  $p < 0.01$   $\omega 6$  vs.  $\omega 3$  and b =  $p < 0.01$  NaCl vs CL316,243.

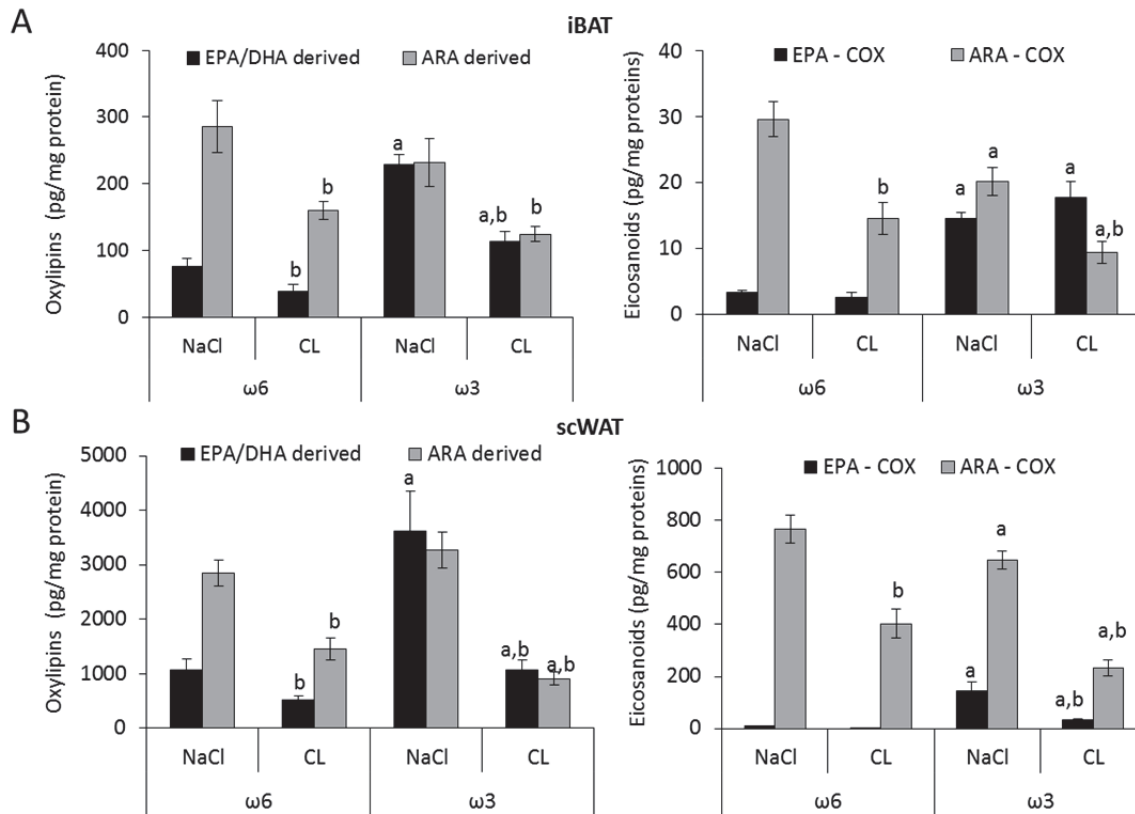

**Supplemental Figure S2. Abundance of ω6 and ω3 PUFA-derived oxylipins in BAT and WAT.**

Oxylipin levels were measured by LC-MS/MS in iBAT and scWAT of vehicle and CL316,243-treated mice fed with ω6 and ω3 diet. Total abundance of oxylipins in (A) iBAT and (B) scWAT of ω6 diet and ω3 diet-fed mice in response to vehicle and CL316,243-treatment. Oxylipins were classified by their origin, *i.e.* derived from the metabolism of the ω3 PUFAs EPA and DHA, or from the ω6 PUFA ARA. Data are presented as mean ± SEM of 8 mice per group. a = p<0.01 ω6 vs ω3 and b = p<0.01 NaCl vs CL316,243.

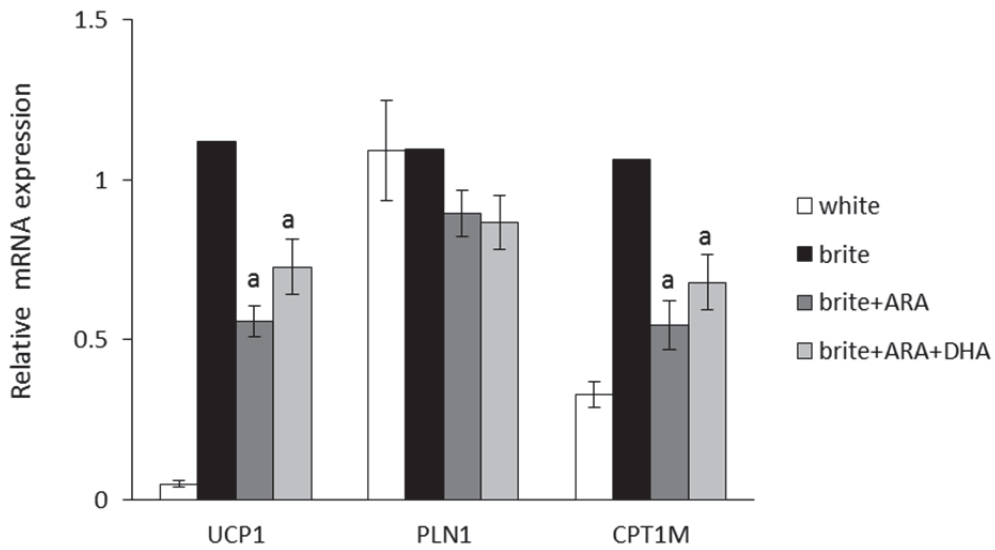

**Supplemental Figure S3. DHA did not compete with ARA.** hMADS cells were differentiated into white or brite adipocytes. Brite hMADS adipocytes were treated with 10  $\mu$ M ARA in the presence or absence of 3.3  $\mu$ M DHA during the last 3 days of adipogenic differentiation. mRNA expressions were evaluated by RT-qPCR and expressed as fold relative to “brite” values. Data are presented as mean  $\pm$  SEM of 3 independent experiments. a =  $p < 0.01$  vs brite and b =  $p < 0.01$  vs brite + ARA.

**Supplemental Table S1. Diet composition.**

|                                             | <b>ω6 diet</b> | <b>ω3 diet</b> |
|---------------------------------------------|----------------|----------------|
| <b>Metabolizable energy [KCal/g]</b>        | 3.2            |                |
| <b>Crude protein [g/Kg]</b>                 | 159            |                |
| <b>Digestible carbohydrate [g/Kg]</b>       | 519            |                |
| <b>Crude fat [g/Kg]</b>                     | 51             |                |
| <b>Saturated FAs [% of total FAs]</b>       | 12             |                |
| <b>Monounsaturated FAs [% of total FAs]</b> | 26             | 14             |
| <b>Polyunsaturated FAs [% of total FAs]</b> | 62             | 74             |
| <b>Linoleic acid [g/Kg]</b>                 | 30             |                |
| <b>Alpha-linolenic [g/Kg]</b>               | 1              | 6.4            |
| <b>EPA [g/Kg]</b>                           | 0              | 0.8            |
| <b>DHA [g/Kg]</b>                           | 0              | 0.8            |
| <b>Σ ω6 [g/Kg]</b>                          | 30             |                |
| <b>Σ ω3 [g/Kg]</b>                          | 1              | 8              |
| <b>ω6 / ω3 PUFA ratio</b>                   | <b>30</b>      | <b>3.75</b>    |

**Supplemental Table S2. List of analyzed oxylipins**

| ARA-derived oxylipins     |            |           | EPA/DHA-derived oxylipins |         |              |
|---------------------------|------------|-----------|---------------------------|---------|--------------|
| ARA-COX                   | ARA-LOX    | ARA-other | EPA-COX                   | EPA-LOX | DHA-LOX      |
| 11 $\beta$ -PGF2 $\alpha$ | 5-HETE     | 5,6-EET   | 18-HEPE                   | LTB5    | 14-HDoHE     |
| 15 $\Delta$ -PGJ2         | 8-HETE     | 8,9-EET   | PGE3                      |         | 17-HDoHE     |
| 6keto-PGF1 $\alpha$       | 12-HETE    | 11,12-EET |                           |         | Maresin 1    |
| 8iso-PGA2                 | 15-HETE    | 14,15-EET |                           |         | Protectin Dx |
| PGD2                      | 5,6-DiHETE |           |                           |         | Resolvin D1  |
| PGE2                      | 5oxoETE    |           |                           |         | Resolvin D2  |
| PGF2 $\alpha$             | LTB4       |           |                           |         |              |
| TxB2                      | LxA4       |           |                           |         |              |
|                           | LxB4       |           |                           |         |              |
